# Supplementary material
Source: publisher figshare collection journal article supplement (https://adisjournals.figshare.com/articles/dataset/_/6621683)
Supplement: Supplementary file 1 [file 2]

Archive with 2 entries (2 files):
- Summary Slide.png
- SGLT2i Prescribing Tool_050218.pdf
