# Supplementary material
Source: publisher figshare collection journal article supplement (https://adisjournals.figshare.com/articles/dataset/_/6621683)
Supplement: Supplementary file 3 [file 3]

Archive with 2 entries (2 files):
- Summary Slide.png
- IDSC - Prescribing Tool.pdf
