# Supplementary material
Source: publisher figshare collection journal article supplement (https://adisjournals.figshare.com/articles/dataset/_/6621683)
Supplement: Supplementary file 3 [file 3 › IDSC - Prescribing Tool.pdf]

## SGLT2i Prescribing Tool

The Prescribing Tool is a quick reference guide to support clinicians with treatment decisions concerning SGLT2i therapies. The Tool aims to provide clarity regarding common areas of confusion in clinical practice, such as early and late use of SGLT2i treatments within the T2DM pathway, the risk of diabetic acidosis and lower limb amputations or bone fractures. The traffic light system highlights the types of people or situations you may encounter and appropriate approaches to prescribing in these cases:

- **Green:** Evidence supports SGLT2i prescribing in these situations
- **Amber:** Prescribe SGLT2i with caution
- **Red:** Do not prescribe SGLT2i

An evidence level has been assigned to each category, based on randomised controlled trial (RCT) and observational data as well as NICE/SIGN guidelines and the licensed indication for each therapy within the SGLT2i class of medicines. The level of evidence has been scored according to the ADA Evidence-Grading System (summarised below).<sup>1</sup>

### ADA evidence-grading system for “Standards of Medical Care in Diabetes”<sup>1</sup>

| Grade level | Description                                                                                                                                                                                                                                                                                                         |
|-------------|---------------------------------------------------------------------------------------------------------------------------------------------------------------------------------------------------------------------------------------------------------------------------------------------------------------------|
| A           | Clear evidence from well-conducted, generalisable RCTs that are adequately powered, including: <ul style="list-style-type: none"><li>• Evidence from a well-conducted multicentre trial or meta-analysis that incorporated quality ratings in the analysis</li><li>• Compelling non-experimental evidence</li></ul> |
| B           | Supportive evidence from well-conducted cohort studies<br>Supportive evidence from a well-conducted case-control study                                                                                                                                                                                              |
| C           | Supportive evidence from poorly controlled or uncontrolled studies<br>Conflicting evidence with the weight of evidence supporting the recommendation                                                                                                                                                                |
| E           | Expert consensus or clinical experience                                                                                                                                                                                                                                                                             |

**NB.** Where data are conflicting or lacking, advice has been provided that is based upon expert opinion and experience in T2DM management

#### Abbreviations

T2DM, Type 2 diabetes mellitus; SGLT2i, sodium-glucose co-transporter-2 inhibitor; ADA, American Diabetes Association; RCT, randomised controlled trial; ACR, albumin:creatinine ratio; BMI, body mass index; PAD, peripheral arterial disease; CV, cardiovascular; CVD, cardiovascular disease; eGFR, estimated glomerular filtration rate; UTIs, urinary tract infections; DKA, diabetic ketoacidosis; CKD, chronic kidney disease.

The SGLT2i Prescribing Tool has been prepared by the Improving Diabetes Steering Committee. Napp Pharmaceuticals has fully funded the creation of this non-promotional document and has reviewed and certified it for medical accuracy and compliance with the ABPI Code of Practice.

| Category                             | Clinical situation                                                                  | Potential implications <sup>2-8</sup>          | Evidence level <sup>1</sup>                          |
|--------------------------------------|-------------------------------------------------------------------------------------|------------------------------------------------|------------------------------------------------------|
| Evidence supports SGLT2i prescribing | First-line (metformin intolerant)                                                   |                                                | A + B + E                                            |
|                                      | Second-line to metformin                                                            |                                                | A + B + E                                            |
|                                      | Third-line (add-on to second-line therapies)                                        |                                                | A + B + E                                            |
|                                      | Combination with basal insulin or multiple daily injections of insulin <sup>†</sup> |                                                | A + B + E                                            |
|                                      | Established CVD                                                                     |                                                | A + B + E                                            |
|                                      | History of heart failure                                                            |                                                | A + B + E                                            |
|                                      | No history of lower limb amputation                                                 |                                                | A                                                    |
|                                      | No history of PAD                                                                   |                                                | A                                                    |
|                                      | ACR >3 mg/mmol                                                                      |                                                | A                                                    |
|                                      | GLP-1 receptor agonist combination                                                  |                                                | A + additional evidence required to support decision |
|                                      | eGFR ≥60 mL/min/1.73m <sup>2</sup> †                                                |                                                | A + B + E                                            |
|                                      | Overweight or obese                                                                 |                                                | A + B + E                                            |
|                                      | Vulnerable to the effects of hypoglycaemia                                          |                                                | A                                                    |
| Prescribe SGLT2i with caution        | History of PAD                                                                      | Lower limb amputation risk                     | A + C                                                |
|                                      | Osteoporosis                                                                        | Lower limb amputation/bone fracture risk       | A + B + E                                            |
|                                      | Frail/elderly                                                                       | Lower limb amputation/bone fracture/falls risk | A + B                                                |
|                                      | History of foot ulceration                                                          | Lower limb amputation risk                     | A                                                    |
|                                      | History of fractures                                                                | Bone fracture risk                             | A + C                                                |
|                                      | Receiving loop diuretics**                                                          |                                                | A + E                                                |
|                                      | Ketogenic diet                                                                      | DKA risk                                       | E                                                    |
|                                      | High HbA1c levels (>86 mmol/mol or 10%) •                                           | DKA risk, likely to need insulin               | A + B + E                                            |
|                                      | Systemic steroid therapy                                                            | DKA risk/outside of licensed indication        | E                                                    |
|                                      | Cognitive impairment                                                                |                                                | E                                                    |
|                                      | BMI <25                                                                             | DKA risk                                       | E                                                    |
|                                      | Previous lower limb amputation                                                      | Lower limb amputation risk                     | A + C                                                |
|                                      | Existing diabetic foot ulcers                                                       | Lower limb amputation risk                     | A                                                    |
|                                      | Type 1 diabetes (diagnosed or suspected) (dapagliflozin 5mg only)*                  | DKA risk                                       | A + E                                                |
|                                      | Recurrent UTIs                                                                      | UTI risk                                       | E                                                    |
|                                      | Male with benign prostatic hypertrophy                                              | UTI risk                                       | E                                                    |
| Do not prescribe SGLT2i              | Stage 3 CKD/eGFR <60 mL/min/1.73m <sup>2</sup> †                                    | Outside of licensed indication                 |                                                      |
|                                      | DKA (or previous episode of DKA)                                                    | DKA risk                                       | E + conflicting evidence                             |
|                                      | Eating disorders                                                                    | DKA risk                                       | E                                                    |
|                                      | Rapid progression to insulin (within 1 year)                                        | DKA risk                                       | E                                                    |
|                                      | Latent autoimmune diabetes                                                          | DKA risk                                       | A + E                                                |
|                                      | Excessive alcohol intake                                                            | DKA risk/outside of licensed indication        | A + E                                                |
|                                      | Diabetes due to pancreatic disease                                                  | DKA risk/outside of licensed indication        | A + E                                                |
|                                      | Genetic diabetes                                                                    | Outside of licensed indication                 |                                                      |
|                                      | Acute illness†                                                                      | Outside of licensed indication                 |                                                      |
|                                      | Pregnancy (or suspected pregnancy), planning pregnancy or breastfeeding             | Outside of licensed indication                 |                                                      |
|                                      | Recent major surgery                                                                | Outside of licensed indication                 |                                                      |
|                                      | Past history of necrotising fasciitis of the perineum (Fournier's gangrene)         | Fournier's gangrene risk                       | E                                                    |

<sup>†</sup>SGLT2i therapies should be prescribed with caution in people requiring a rapid reduction in insulin dose, due to insulinopenia, which may increase DKA risk.<sup>2-5</sup> \*Decisions should be based upon recent eGFR measurement, rather than historical tests. †SGLT2i therapies may be initiated in people with eGFR ≥60 mL/min/1.73m<sup>2</sup> and may continue to be prescribed in those requiring tighter glycaemic control until eGFR reaches <45 mL/min/1.73m<sup>2</sup>. •Monitor HbA1c levels regularly and cease SGLT2is if elevated levels continue. \*\*The CREDENCE study and some sub-populations enrolled in published SGLT2i CV outcome trials included people receiving loop diuretics.<sup>9-12</sup> However, canagliflozin is not currently licensed for use alongside loop diuretics and other SGLT2is recommend ongoing monitoring for signs of volume depletion.<sup>2-5</sup> •Dapagliflozin (5 mg) is the only SGLT2i licensed for in Type 1 diabetes (adjunct to insulin; initiated and supervised by a specialist). †SGLT2i treatment should be suspended in individuals with acute illness until fully recovered.<sup>2-5,13,14</sup> Urinary symptoms, due to glucosuria, can be an issue for people prescribed SGLT2i medicines.<sup>2-5</sup> However, UTIs are relatively rare and these medicines may be prescribed for people with a history of UTIs.

The SGLT2i Prescribing Tool has been prepared by the Improving Diabetes Steering Committee. Napp Pharmaceuticals has fully funded the creation of this non-promotional document and has reviewed and certified it for medical accuracy and compliance with the ABPI Code of Practice.

#### References

1. American Diabetes Association. Standards of medical care in diabetes. Diabetes Care. 2017;40(1):S1–2.
2. Napp Pharmaceuticals Limited. Canagliflozin: summary of product characteristics. 2019. <https://www.medicines.org.uk/emc/product/8855/smpc>. Accessed January 2020.
3. AstraZeneca UK Limited. Dapagliflozin: summary of product characteristics. 2019. <https://www.medicines.org.uk/emc/product/7607/smpc>. Accessed January 2020.
4. Boehringer Ingelheim Limited. Empagliflozin: summary of product characteristics. 2019. <https://www.medicines.org.uk/emc/product/7703/smpc>. Accessed January 2020.
5. Merck Sharp and Dohme Limited. Ertugliflozin: summary of product characteristics. 2019. <https://www.medicines.org.uk/emc/product/10099/smpc>. Accessed January 2020.
6. National Institute for Health and Care Excellence. Type 2 diabetes in adults: management. 2017. <https://www.nice.org.uk/guidance/ng28>. Accessed April 2018.
7. Scottish Intercollegiate Guideline Network (SIGN). Pharmacological management of glycaemic control in people with type 2 diabetes. Edinburgh: SIGN '154' - as per SIGN permission guidelines; 2017. <http://www.sign.ac.uk/assets/sign154.pdf>. Accessed January 2020.
8. National Institute for Health and Care Excellence. Canagliflozin, dapagliflozin and empagliflozin as monotherapies for treating type 2 diabetes. Technology appraisal guidance. 2016. <https://www.nice.org.uk/guidance/ta390>. Accessed January 2020.
9. Perkovic V, Jardine MJ, Neal B, et al. Canagliflozin and Renal Outcomes in Type 2 Diabetes and Nephropathy. N Engl J Med. 2019 Jun 13;380(24):2295-306.
10. Zinman B, Wanner C, Lachin JM, et al. Empagliflozin, cardiovascular outcomes, and mortality in type 2 diabetes. N Engl J Med. 2015;373:2117–28.
11. Neal B, Perkovic V, Mahaffey KW, et al. Canagliflozin and cardiovascular and renal events in type 2 diabetes. N Engl J Med. 2017;377(7):644–57.
12. Wiviott SD, Raz I, Bonaca MP, et al. Dapagliflozin and Cardiovascular Outcomes in Type 2 Diabetes. N Engl J Med. 2019 Jan 24;380(4):347-57.
13. UK Medicines and Healthcare Products Regulatory Agency. 2016. SGLT2 inhibitors: updated advice on the risk of diabetic ketoacidosis. <https://www.gov.uk/drug-safety-update/sglt2-inhibitors-updated-advice-on-the-risk-of-diabetic-ketoacidosis>. Accessed January 2020.
14. EMA. EMA confirms recommendations to minimise ketoacidosis risk with SGLT2 inhibitors for diabetes. 2016. [http://www.ema.europa.eu/docs/en\\_GB/document\\_library/Referrals\\_document/SGLT2\\_inhibitors-20/European\\_Commission\\_final\\_decision/WC500202393.pdf](http://www.ema.europa.eu/docs/en_GB/document_library/Referrals_document/SGLT2_inhibitors-20/European_Commission_final_decision/WC500202393.pdf). Accessed January 2020.
