# Supplementary material
Source: publisher figshare collection journal article supplement (https://adisjournals.figshare.com/articles/dataset/_/6621683)

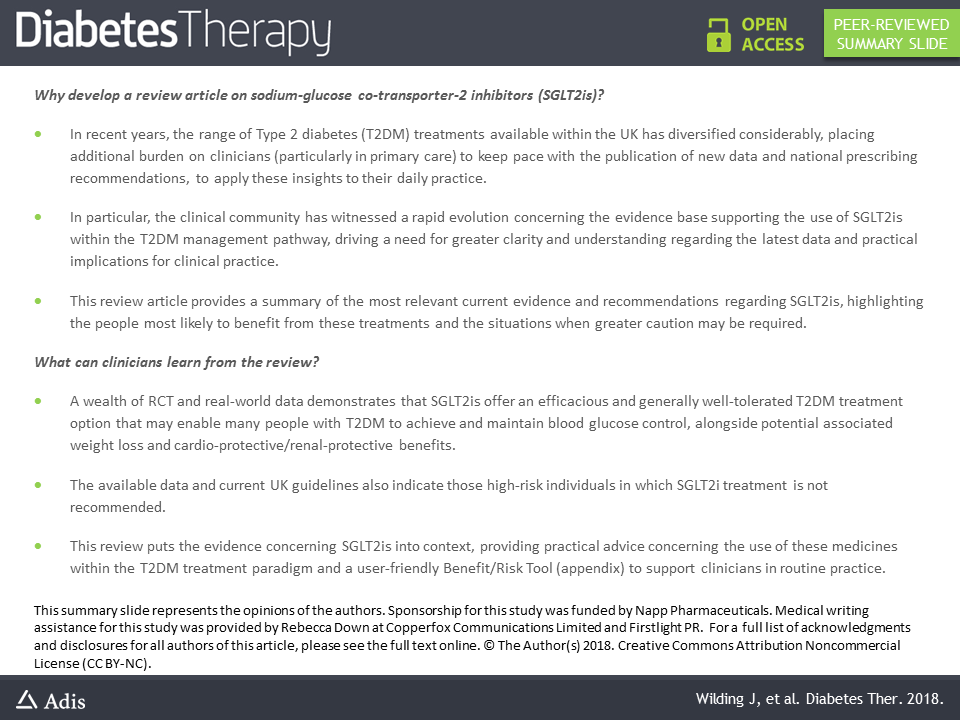

Supplement: Supplementary file 1 [file 2 › Summary Slide.png]
